# Supplementary material for: Comparison of water-soluble and insoluble organic compositions attributing to different light absorption efficiency between residential coal and biomass burning emissions
Source: Copernicus journal article supplement (doi:10.5194/egusphere-2023-2417), 2023-11-13
Supplement: Supplementary file 1 [file egusphere-2023-2417-supplement.pdf]

## *Supporting information (SI)*

### **Comparison of water-soluble and insoluble organic compositions attributing to different light absorption efficiency between residential coal and biomass burning emissions**

Lu Zhang <sup>1,2</sup>, Jin Li <sup>1</sup>, Yaojie Li<sup>1</sup>, Xinlei Liu <sup>1</sup>, Zhihan Luo <sup>1</sup>, Guofeng Shen <sup>1,\*</sup>, and Shu Tao <sup>1,3</sup>

1. *Laboratory for Earth Surface Process, College of Urban and Environmental Sciences, Peking University, Beijing 100871, China*
2. *Hong Kong Polytechnic University, Department of Civil & Environmental Engineering, Kowloon, Hong Kong, China*
3. *College of Environmental Science and Technology, Southern University of Science and Technology, Shenzhen 518055, China*

*\* Corresponding author: Dr. Guofeng Shen, Peking University, Email: [gfshe12@pku.edu.cn](mailto:gfshe12@pku.edu.cn)*

## S1. Data analysis.

### ESI FT-ICR MS data processing

Custom software was used to determine possible formulas for ions with a signal-to-noise ratio higher than 5 in the  $m/z$  range of 150-800 using a mass tolerance of  $\pm 1.0$  ppm. The maximum number of atoms for the formula calculator was set to: 60  $^{12}\text{C}$ , 60  $^1\text{H}$ , 20  $^{16}\text{O}$ , 3  $^{14}\text{N}$ , 2  $^{32}\text{S}$ , 1  $^{13}\text{C}$ , 1  $^{18}\text{O}$ , and 2  $^{34}\text{S}$ . The identified formulas containing isotopomers (i.e.  $^{13}\text{C}$ ,  $^{18}\text{O}$ , or  $^{34}\text{S}$ ) were not included in the final discussion. The formulas identified were classified into four sorts including CHO, CHON, CHOS, and CHONS compounds. For the chemical formula  $\text{C}_c\text{H}_h\text{O}_o\text{N}_n\text{S}_s$ , where  $c$ ,  $h$ ,  $o$ ,  $n$ ,  $s$  represented the atom numbers of carbon, hydrogen, oxygen, nitrogen, and sulfur, respectively.

The double bonds equivalent (DBE) which indicate the unsaturated degree was calculated as:

$$\text{DBE} = (2c + 2 - h + n)/2$$

The modified aromaticity index ( $\text{AI}_{\text{mod}}$ ) was calculated according to published studies (Bianco et al., 2018; Song et al., 2022):

$$\text{AI}_{\text{mod}} = (1 + c - 0.5o - s - 0.5h)/(c - 0.5o - s - n)$$

The formulae with a negative  $\text{AI}_{\text{mod}}$  value were considered as value of zero, and treated as aliphatic compounds. The  $\text{AI}_{\text{mod}}$  value of larger than 0 to less than 0.5 was identified as olefinic compounds, aromatic compounds were identified as  $0.5 \leq \text{AI}_{\text{mod}} < 0.67$  and  $\text{AI}_{\text{mod}} \geq 0.67$  were condensed aromatic compounds.

In order to consider the intensity of each formula and its contribution to the overall property, the relative abundance weighted molecular weight, elemental ratios, DBE, and  $\text{AI}_{\text{mod}}$  were calculated based on the following equations

$$\text{MW}_w = \sum(\text{In}_i * \text{MW}_i) / \sum \text{In}_i$$

$$\text{H/C}_w = \sum(\text{In}_i * \text{H/C}_i) / \sum \text{In}_i$$

$$\text{O/C}_w = \sum(\text{In}_i * \text{O/C}_i) / \sum \text{In}_i$$

$$\text{O/N}_w = \sum(\text{In}_i * \text{O/N}_i) / \sum \text{In}_i$$

$$\text{O/S}_w = \sum(\text{In}_i * \text{O/S}_i) / \sum \text{In}_i$$

$$\text{DBE}_w = \sum(\text{In}_i * \text{DBE}_i) / \sum \text{In}_i$$

$$\text{DBE/C}_w = \sum(\text{In}_i * \text{DBE/C}_i) / \sum \text{In}_i$$

$$\text{AI}_{\text{mod},w} = \sum(\text{In}_i * \text{AI}_{\text{mod},i}) / \sum \text{In}_i$$

Where  $\text{In}_i$  is the intensity for each individual molecular formula,  $i$  and the  $\text{MW}_i$ ,  $\text{H/C}_i$ ,  $\text{O/C}_i$ ,  $\text{O/N}_i$ ,  $\text{O/S}_i$ ,  $\text{DBE}_i$ ,  $\text{DBE/C}_i$ , and  $\text{AI}_i$ , and  $\text{OS}_i$  also indicate the MW, H/C, O/C, O/N, O/S, DBE, DBE/C, and  $\text{AI}_{\text{mod}}$  of the individual molecular formula.

## S2. Tables.

Table S1 Solid fuel properties and stoves used in this work.

| Fuel types                           | C, % | H, % | N, %   | S, %   | $M_{ad}^a$ , % | $V_{daf}^b$ , % | $A_{ad}^c$ , % | LHV, MJ/kg | Rank <sup>d</sup> | Stove |
|--------------------------------------|------|------|--------|--------|----------------|-----------------|----------------|------------|-------------------|-------|
| <b>Chunk coals</b>                   |      |      |        |        |                |                 |                |            |                   |       |
| Shanxi-1                             | 82.7 | 2.89 | 0.915  | 0.527  | 2.46           | 4.49            | 5.97           | 30.6       | AN                | TS    |
| Hebei-1                              | 70.7 | 2.04 | 0.750  | 0.285  | 5.75           | 4.56            | 5.41           | 28.5       | AN                | TS    |
| Shanxi-2                             | 77.3 | 4.19 | 0.590  | 0.738  | 1.82           | 23.6            | 9.88           | 20.8       | MVB               | TS    |
| Shanxi-3                             | 71.7 | 4.49 | 0.680  | 0.315  | 7.73           | 27.8            | 1.24           | 26.8       | MVB               | TS    |
| <i>Shandong-1</i>                    | 71.2 | 4.68 | 0.610  | 0.303  | 6.91           | 29.4            | 1.68           | 27.0       | MVB               | TS    |
| Shandong-2                           | 56.6 | 4.25 | 0.545  | 1.36   | 12.4           | 29.8            | 11.4           | 36.1       | MVB               | TS    |
| Inner Mongolia-1                     | 57.2 | 3.38 | 0.475  | 0.303  | 4.58           | 30.8            | 48.1           | 28.3       | MVB               | TS    |
| Hebei-2                              | 72.7 | 4.66 | 0.650  | 0.317  | 4.91           | 32.4            | 2.29           | 26.2       | HVB               | TS    |
| Inner Mongolia-2                     | 32.9 | 3.65 | 0.645  | 0.872  | 15.9           | 34.1            | 12.1           | 17.6       | HVB               | TS    |
| <i>Shandong-3</i>                    | 70.2 | 5.17 | 0.985  | 0.617  | 6.52           | 36.3            | 2.33           | 26.5       | HVB               | TS    |
| <b>Briquetting coals (round)</b>     |      |      |        |        |                |                 |                |            |                   |       |
| Hebei-3                              | 62.8 | 3.00 | 0.870  | 0.317  | 3.64           | 8.76            | 38.7           | 24.4       | SA                | TS    |
| Shanxi-4                             | 57.9 | 2.73 | 0.725  | 0.392  | 2.88           | 11.3            | 30.3           | 22.0       | SA                | TS    |
| <b>Briquetting coals (honeycomb)</b> |      |      |        |        |                |                 |                |            |                   |       |
| Shanxi-5                             | 26.8 | 1.62 | 0.275  | 0.727  | 1.26           | 5.68            | 35.2           | 14.1       | AN                | TS    |
| Shanxi-6                             | 49.9 | 2.40 | 0.705  | 0.426  | 1.54           | 9.83            | 34.6           | 24.4       | SA                | TS    |
| <b>Wood fuel</b>                     |      |      |        |        |                |                 |                |            |                   |       |
| birch wood                           | 45.6 | 6.45 | 0.105  | 0.217  | 7.40           | 81.8            | 0.396          | 16.2       |                   | TS    |
| <i>pine wood</i>                     | 46.8 | 6.40 | 0.0600 | 0.228  | 7.03           | 77.4            | 1.23           | 17.2       |                   | TS&IS |
| poplar wood                          | 46.4 | 6.32 | 0.120  | 0.191  | 7.15           | 76.7            | 1.18           | 16.5       |                   | TS    |
| <b>Crop straws</b>                   |      |      |        |        |                |                 |                |            |                   |       |
| bean straw                           | 40.6 | 6.15 | 1.07   | 0.284  | 11.3           | 71.6            | 5.89           | 12.4       |                   | TS    |
| corn straw                           | 42.3 | 6.31 | 1.03   | 0.219  | 8.68           | 88.1            | 4.69           | 13.9       |                   | TS&IS |
| peanut straw                         | 39.0 | 6.00 | 1.27   | 0.419  | 10.9           | 67.1            | 8.61           | 16.4       |                   | TS    |
| <i>rice straw</i>                    | 40.8 | 6.12 | 0.605  | 0.247  | 9.79           | 68.9            | 6.13           | 15.3       |                   | TS    |
| wheat straw                          | 36.2 | 5.84 | 0.680  | 0.255  | 8.17           | 65.7            | 11.0           | 14.0       |                   | TS    |
| rape straw                           | 41.9 | 6.27 | 0.305  | 0.376  | 10.1           | 75.7            | 3.87           | 15.1       |                   | TS&IS |
| sesame straw                         | 39.1 | 5.50 | 1.21   | 0.582  | 11.7           | 66.9            | 8.25           | 13.8       |                   | TS    |
| <b>Corn cob</b>                      | 43.9 | 6.32 | 0.465  | 0.240  | 6.98           | 75.1            | 1.02           | 13.9       |                   | TS    |
| <b>Bamboo</b>                        | 44.9 | 6.24 | 0.420  | 0.380  | 6.64           | 75.1            | 2.09           | 17.3       |                   | TS    |
| <b>Pellet fuels</b>                  |      |      |        |        |                |                 |                |            |                   |       |
| <i>corn straw</i>                    | 40.1 | 5.76 | 0.725  | 0.233  | 6.24           | 66.2            | 13.0           | 11.5       |                   | IS    |
| <i>pine wood</i>                     | 46.4 | 6.53 | 0.155  | 0.0915 | 5.12           | 76.5            | 3.12           | 16.4       |                   | IS    |
| fruit tree logs                      | 45.9 | 6.33 | 0.270  | 0.309  | 4.39           | 77.4            | 4.24           | 16.5       |                   | IS    |
| rice husk                            | 39.3 | 5.43 | 0.455  | 0.104  | 4.44           | 67.8            | 15.5           | 12.9       |                   | IS    |
| Red wood                             | 42.3 | 5.39 | 0.367  | 0.206  | 4.96           | 72.3            | 10.1           | 17.4       |                   | IS    |

Notes: <sup>a</sup>Moisture on air-dry basis (%); <sup>b</sup>Volatile matter on dry and ash-free basis (%); <sup>c</sup>Ash on air-dry basis (%); <sup>d</sup>Rank by ASTM standard classification of coal [American Society for Testing and Material, 2004]. AN is for ordinary anthracite, SA is for semi-anthracite, MVB is for medium-volatile bituminous coal, HVB is for high-volatile bituminous coal. In addition, the 14 coals were produced in Shanxi province (Shanxi 1-6), Shandong province (Shandong 1-3), Inner Mongolia province (Inner Mongolia 1-2), and Hebei province (Hebei 1-3). The fuel written in red color were chosen for further FT-ICR MS analysis.

Table S2. Number of formulas in each compound category and the average values of elemental ratios, molecular weight (MW), and double-bond equivalents (DBE) in WSOC and WISOC of different samples.

| Sample type                      | Elemental composition | WSOC               |                 |                  |                  |                  |                  |                    |                     | WISOC              |                 |                  |                  |                  |                  |                    |                     |
|----------------------------------|-----------------------|--------------------|-----------------|------------------|------------------|------------------|------------------|--------------------|---------------------|--------------------|-----------------|------------------|------------------|------------------|------------------|--------------------|---------------------|
|                                  |                       | Number of formulae | MW <sub>w</sub> | H/C <sub>w</sub> | O/C <sub>w</sub> | O/N <sub>w</sub> | DBE <sub>w</sub> | DBE/C <sub>w</sub> | AI <sub>mod,w</sub> | Number of formulae | MW <sub>w</sub> | H/C <sub>w</sub> | O/C <sub>w</sub> | O/N <sub>w</sub> | DBE <sub>w</sub> | DBE/C <sub>w</sub> | AI <sub>mod,w</sub> |
| HVB                              | Total                 | 3119               | 380             | 1.1              | 0.33             |                  | 10               | 0.52               | 0.43                | 2746               | 640             | 1.0              | 0.36             |                  | 20               | 0.57               | 0.46                |
|                                  | CHO                   | 971                | 328             | 0.91             | 0.30             |                  | 11               | 0.61               | 0.53                | 853                | 375             | 0.86             | 0.24             |                  | 14               | 0.62               | 0.57                |
|                                  | CHON                  | 1222               | 377             | 1.1              | 0.35             | 5.3              | 10               | 0.54               | 0.46                | 854                | 649             | 0.73             | 0.26             | 6.8              | 26               | 0.69               | 0.65                |
|                                  | CHOS                  | 550                | 428             | 1.3              | 0.32             |                  | 10               | 0.42               | 0.29                | 473                | 670             | 1.2              | 0.45             |                  | 14               | 0.43               | 0.27                |
|                                  | CHONS                 | 376                | 518             | 1.6              | 0.36             | 5.0              | 7.5              | 0.30               | 0.17                | 566                | 707             | 1.1              | 0.44             | 9.7              | 19               | 0.52               | 0.38                |
| Coal MVB                         | Total                 | 2612               | 435             | 1.2              | 0.29             |                  | 11               | 0.47               | 0.38                | 2968               | 552             | 0.89             | 0.24             |                  | 20               | 0.61               | 0.55                |
|                                  | CHO                   | 892                | 320             | 1.0              | 0.31             |                  | 10               | 0.54               | 0.45                | 997                | 396             | 0.89             | 0.23             |                  | 14               | 0.60               | 0.55                |
|                                  | CHON                  | 756                | 456             | 1.1              | 0.29             | 5.3              | 13               | 0.51               | 0.43                | 972                | 539             | 0.88             | 0.26             | 5.2              | 20               | 0.63               | 0.58                |
|                                  | CHOS                  | 459                | 425             | 1.4              | 0.38             |                  | 8.8              | 0.37               | 0.24                | 442                | 548             | 1.4              | 0.37             |                  | 11               | 0.35               | 0.24                |
|                                  | CHONS                 | 505                | 540             | 1.3              | 0.22             | 4.3              | 12               | 0.39               | 0.31                | 557                | 640             | 0.80             | 0.21             | 3.9              | 25               | 0.66               | 0.60                |
| Rice straw                       | Total                 | 6383               | 384             | 1.1              | 0.34             |                  | 11               | 0.52               | 0.41                | 6946               | 476             | 1.2              | 0.27             |                  | 12               | 0.44               | 0.35                |
|                                  | CHO                   | 1580               | 338             | 1.1              | 0.39             |                  | 10               | 0.53               | 0.40                | 2142               | 431             | 1.2              | 0.24             |                  | 11               | 0.42               | 0.35                |
|                                  | CHON                  | 2558               | 393             | 1.2              | 0.34             | 5.1              | 11               | 0.52               | 0.40                | 2477               | 472             | 1.2              | 0.29             | 6.0              | 12               | 0.46               | 0.38                |
|                                  | CHOS                  | 1044               | 418             | 1.0              | 0.24             |                  | 14               | 0.55               | 0.47                | 1138               | 533             | 1.2              | 0.29             |                  | 14               | 0.41               | 0.33                |
|                                  | CHONS                 | 1201               | 481             | 1.3              | 0.32             | 4.2              | 12               | 0.42               | 0.33                | 1189               | 590             | 1.3              | 0.33             | 5.2              | 14               | 0.43               | 0.32                |
| Raw biomass Pine wood            | Total                 | 4291               | 413             | 1.1              | 0.33             |                  | 12               | 0.53               | 0.43                | 3525               | 549             | 1.0              | 0.29             |                  | 17               | 0.53               | 0.44                |
|                                  | CHO                   | 1978               | 374             | 1.0              | 0.32             |                  | 12               | 0.56               | 0.47                | 1445               | 444             | 0.94             | 0.24             |                  | 15               | 0.57               | 0.51                |
|                                  | CHON                  | 763                | 437             | 1.2              | 0.37             | 6.2              | 12               | 0.47               | 0.36                | 690                | 563             | 0.95             | 0.26             | 5.4              | 20               | 0.59               | 0.53                |
|                                  | CHOS                  | 922                | 486             | 1.1              | 0.28             |                  | 15               | 0.49               | 0.42                | 884                | 613             | 1.2              | 0.36             |                  | 14               | 0.42               | 0.27                |
|                                  | CHONS                 | 628                | 570             | 1.3              | 0.40             | 5.7              | 11               | 0.41               | 0.25                | 506                | 642             | 1.1              | 0.35             | 5.6              | 18               | 0.50               | 0.38                |
| Pine wood-improved stove         | Total                 | 3991               | 412             | 1.1              | 0.33             |                  | 11               | 0.49               | 0.39                | 3270               | 566             | 1.1              | 0.32             |                  | 15               | 0.49               | 0.38                |
|                                  | CHO                   | 1587               | 383             | 1.0              | 0.31             |                  | 12               | 0.54               | 0.45                | 1240               | 455             | 1.0              | 0.26             |                  | 15               | 0.54               | 0.47                |
|                                  | CHON                  | 911                | 402             | 1.3              | 0.37             | 5.8              | 10               | 0.46               | 0.35                | 597                | 584             | 1.1              | 0.33             | 5.8              | 17               | 0.50               | 0.40                |
|                                  | CHOS                  | 929                | 446             | 1.1              | 0.28             |                  | 14               | 0.51               | 0.42                | 727                | 584             | 1.3              | 0.39             |                  | 13               | 0.40               | 0.28                |
|                                  | CHONS                 | 564                | 496             | 1.6              | 0.39             | 5.2              | 7.4              | 0.31               | 0.16                | 706                | 652             | 1.2              | 0.31             | 5.6              | 17               | 0.48               | 0.35                |
| Biomass pellet Crop straw pellet | Total                 | 4371               | 403             | 1.2              | 0.39             |                  | 10               | 0.49               | 0.36                | 2830               | 559             | 1.3              | 0.31             |                  | 13               | 0.43               | 0.32                |
|                                  | CHO                   | 1195               | 366             | 1.1              | 0.40             |                  | 10               | 0.52               | 0.40                | 855                | 451             | 1.2              | 0.25             |                  | 11               | 0.43               | 0.35                |
|                                  | CHON                  | 1447               | 388             | 1.2              | 0.37             | 5.7              | 10               | 0.51               | 0.40                | 778                | 488             | 1.3              | 0.29             | 5.6              | 12               | 0.42               | 0.34                |
|                                  | CHOS                  | 993                | 406             | 1.1              | 0.37             |                  | 11               | 0.51               | 0.36                | 572                | 640             | 1.2              | 0.39             |                  | 13               | 0.41               | 0.26                |
|                                  | CHONS                 | 736                | 495             | 1.4              | 0.46             | 6.1              | 8.7              | 0.38               | 0.21                | 625                | 621             | 1.2              | 0.29             | 4.4              | 16               | 0.45               | 0.35                |
| Biomass pellet Pine wood pellet  | Total                 | 3964               | 416             | 1.1              | 0.35             |                  | 11               | 0.50               | 0.39                | 2778               | 552             | 1.2              | 0.29             |                  | 15               | 0.45               | 0.35                |
|                                  | CHO                   | 1399               | 387             | 1.0              | 0.34             |                  | 12               | 0.53               | 0.43                | 969                | 453             | 1.2              | 0.23             |                  | 12               | 0.45               | 0.39                |
|                                  | CHON                  | 834                | 399             | 1.2              | 0.38             | 6.1              | 10               | 0.49               | 0.37                | 560                | 547             | 1.2              | 0.29             | 5.9              | 17               | 0.48               | 0.41                |
|                                  | CHOS                  | 1111               | 426             | 1.0              | 0.32             |                  | 13               | 0.53               | 0.41                | 651                | 520             | 1.5              | 0.35             |                  | 9.3              | 0.31               | 0.21                |
|                                  | CHONS                 | 620                | 509             | 1.4              | 0.42             | 5.7              | 9.4              | 0.38               | 0.24                | 598                | 639             | 1.2              | 0.30             | 5.1              | 17               | 0.48               | 0.36                |

Table S3: Stoichiometric ranges of VK classes.

| Class                                | H/C                          | O/C                             |
|--------------------------------------|------------------------------|---------------------------------|
| Lipids-like                          | $1.5 < \text{H/C} \leq 2.0$  | $0 \leq \text{O/C} \leq 0.3$    |
| Aliphatic/peptides-like              | $1.5 < \text{H/C} \leq 2.2$  | $0.3 < \text{O/C} \leq 0.67$    |
| Carboxylic-rich alicyclic molecules  | $0.67 < \text{H/C} \leq 1.5$ | $0.1 \leq \text{O/C} < 0.67$    |
| Carbohydrates-like                   | $1.5 < \text{H/C} \leq 2.5$  | $0.67 < \text{O/C} < 1.0$       |
| Unsaturated hydrocarbons             | $0.67 < \text{H/C} \leq 1.5$ | $\text{O/C} < 0.1$              |
| Condensed aromatic structures        | $0.2 < \text{H/C} \leq 0.67$ | $\text{O/C} < 0.67$             |
| Highly oxygenated compounds<br>(HOC) | $0.67 < \text{H/C} \leq 1.5$ | $0.67 \leq \text{O/C} \leq 1.0$ |

Table S4. Relative percentage (%) of various types of compounds in total identified comp

|                 | Sample type              | Elemental composition | WSOC |          |                 |         |       |       |       | WISOC |          |                 |         |       |       |       |     |
|-----------------|--------------------------|-----------------------|------|----------|-----------------|---------|-------|-------|-------|-------|----------|-----------------|---------|-------|-------|-------|-----|
|                 |                          |                       | AI=0 | 0<AI<0.5 | 0.5≤AI<0.6<br>7 | AI≥0.67 | O/N≥3 | O/S≥4 | O/S≥7 | AI=0  | 0<AI<0.5 | 0.5≤AI<0.6<br>7 | AI≥0.67 | O/N≥3 | O/S≥4 | O/S≥7 |     |
| Coal            | HVB                      | Total                 | 18%  | 28%      | 38%             | 17%     |       |       |       | 21%   | 18%      | 31%             | 29%     |       |       |       |     |
|                 |                          | CHO                   | 2.8% | 26%      | 51%             | 20%     |       |       |       | 1.4%  | 21%      | 51%             | 27%     |       |       |       |     |
|                 |                          | CHON                  | 16%  | 28%      | 37%             | 19%     | 86%   |       |       | 4.0%  | 8.1%     | 35%             | 53%     | 95%   |       |       |     |
|                 |                          | CHOS                  | 33%  | 34%      | 26%             | 7.0%    |       |       |       | 66%   | 32%      | 21%             | 62%     | 16%   | 1.2%  | 95%   | 69% |
|                 |                          | CHONS                 | 58%  | 28%      | 6.9%            | 7.7%    | 72%   | 69%   | 42%   | 40%   | 6.6%     | 30%             | 24%     | 88%   | 88%   | 72%   |     |
|                 | MVB                      | Total                 | 19%  | 47%      | 22%             | 11%     |       |       |       | 10%   | 20%      | 24%             | 46%     |       |       |       |     |
|                 |                          | CHO                   | 7.5% | 39%      | 37%             | 16%     |       |       |       | 1.6%  | 27%      | 51%             | 20%     |       |       |       |     |
|                 |                          | CHON                  | 6.6% | 61%      | 22%             | 10%     | 90%   |       |       | 7.2%  | 21%      | 23%             | 49%     | 86%   |       |       |     |
|                 |                          | CHOS                  | 40%  | 35%      | 20%             | 4.9%    |       |       |       | 70%   | 33%      | 37%             | 52%     | 8.3%  | 2.5%  | 78%   | 43% |
|                 |                          | CHONS                 | 35%  | 47%      | 7.3%            | 10%     | 76%   | 37%   | 21%   | 11%   | 8.9%     | 13%             | 67%     | 48%   | 48%   | 30%   |     |
| Raw biomass     | Rice straw               | Total                 | 13%  | 48%      | 23%             | 15%     |       |       |       | 19%   | 51%      | 20%             | 10%     |       |       |       |     |
|                 |                          | CHO                   | 10%  | 56%      | 25%             | 9.4%    |       |       |       | 16%   | 55%      | 24%             | 4.8%    |       |       |       |     |
|                 |                          | CHON                  | 4.3% | 69%      | 16%             | 11%     | 71%   |       |       | 14%   | 57%      | 20%             | 10%     | 85%   |       |       |     |
|                 |                          | CHOS                  | 23%  | 9.2%     | 35%             | 33%     |       |       |       | 42%   | 25%      | 28%             | 41%     | 11%   | 19%   | 45%   | 33% |
|                 |                          | CHONS                 | 42%  | 17%      | 17%             | 24%     | 60%   | 56%   | 42%   | 30%   | 34%      | 17%             | 19%     | 63%   | 64%   | 40%   |     |
|                 | Pine wood                | Total                 | 11%  | 45%      | 32%             | 12%     |       |       |       | 12%   | 36%      | 30%             | 22%     |       |       |       |     |
|                 |                          | CHO                   | 3.6% | 49%      | 40%             | 7.5%    |       |       |       | 1.3%  | 37%      | 52%             | 10%     |       |       |       |     |
|                 |                          | CHON                  | 25%  | 42%      | 17%             | 16%     | 81%   |       |       | 8.1%  | 27%      | 27%             | 38%     | 86%   |       |       |     |
|                 |                          | CHOS                  | 23%  | 24%      | 22%             | 30%     |       |       |       | 52%   | 26%      | 21%             | 60%     | 10%   | 9.2%  | 72%   | 57% |
|                 |                          | CHONS                 | 34%  | 45%      | 6.4%            | 15%     | 81%   | 78%   | 57%   | 24%   | 25%      | 18%             | 33%     | 76%   | 75%   | 47%   |     |
|                 | Pine wood-improved stove | Total                 | 16%  | 44%      | 28%             | 13%     |       |       |       | 17%   | 43%      | 23%             | 17%     |       |       |       |     |
|                 |                          | CHO                   | 5.4% | 48%      | 35%             | 11%     |       |       |       | 3.2%  | 46%      | 43%             | 7.6%    |       |       |       |     |
|                 |                          | CHON                  | 18%  | 51%      | 20%             | 11%     | 81%   |       |       | 14%   | 41%      | 13%             | 32%     | 91%   |       |       |     |
|                 |                          | CHOS                  | 19%  | 30%      | 29%             | 22%     |       |       |       | 56%   | 31%      | 29%             | 54%     | 8.1%  | 8.5%  | 77%   | 32% |
|                 |                          | CHONS                 | 54%  | 33%      | 6.4%            | 6.8%    | 79%   | 79%   | 43%   | 27%   | 33%      | 25%             | 16%     | 62%   | 71%   | 43%   |     |
| Biomass Pellets | Crop straw pellet        | Total                 | 20%  | 46%      | 22%             | 12%     |       |       |       | 18%   | 58%      | 14%             | 10%     |       |       |       |     |
|                 |                          | CHO                   | 13%  | 48%      | 28%             | 11%     |       |       |       | 11%   | 63%      | 21%             | 5.2%    |       |       |       |     |
|                 |                          | CHON                  | 12%  | 52%      | 24%             | 12%     | 79%   |       |       | 23%   | 49%      | 15%             | 14%     | 87%   |       |       |     |
|                 |                          | CHOS                  | 18%  | 46%      | 22%             | 14%     |       |       |       | 71%   | 49%      | 15%             | 76%     | 7.1%  | 2.5%  | 87%   | 72% |
|                 |                          | CHONS                 | 53%  | 31%      | 5%              | 12%     | 85%   | 82%   | 54%   | 26%   | 33%      | 18%             | 23%     | 55%   | 63%   | 38%   |     |
|                 | Pine wood pellet         | Total                 | 14%  | 49%      | 24%             | 13%     |       |       |       | 21%   | 42%      | 17%             | 20%     |       |       |       |     |
|                 |                          | CHO                   | 6.3% | 54%      | 28%             | 11%     |       |       |       | 6.0%  | 64%      | 26%             | 3.9%    |       |       |       |     |
|                 |                          | CHON                  | 16%  | 53%      | 17%             | 14%     | 82%   |       |       | 21%   | 36%      | 13%             | 30%     | 89%   |       |       |     |
|                 |                          | CHOS                  | 12%  | 46%      | 27%             | 15%     |       |       |       | 67%   | 44%      | 43%             | 41%     | 9.2%  | 6.7%  | 76%   | 42% |
|                 |                          | CHONS                 | 46%  | 33%      | 8.1%            | 13%     | 80%   | 78%   | 48%   | 22%   | 32%      | 16%             | 29%     | 72%   | 76%   | 47%   |     |

### S3. Figures

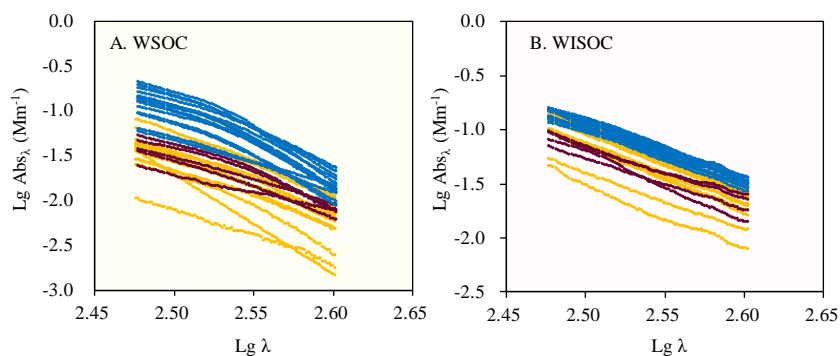

Fig. S1 Absorption Ångström exponent (AAE) calculation for average absorption spectrums in the wavelength of 300-400 nm in WSOC (A) and WISOC (B) extract from source samples.

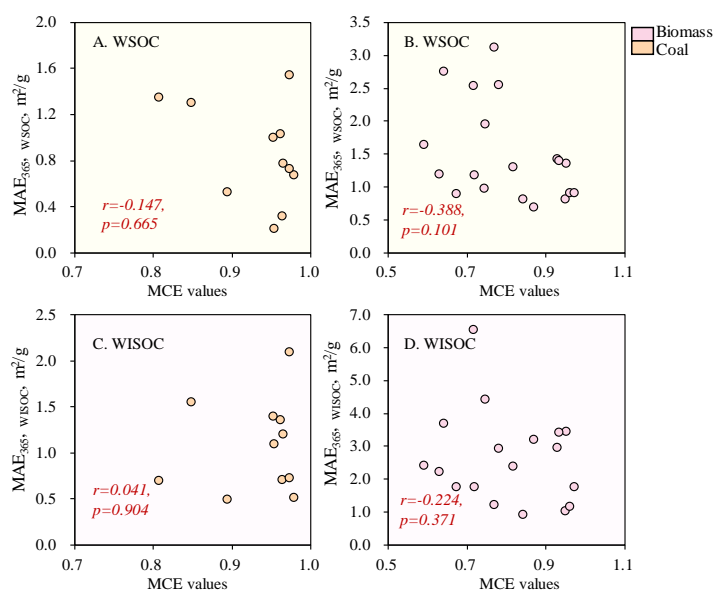

Fig.S2 Correlation between the MCE values with  $MAE_{365, WSOC}$  values from coal combustion smokes (A), and biomass smokes(B); as well as with  $MAE_{365, WISOC}$  from coal combustion smokes (C), and biomass smokes (D)

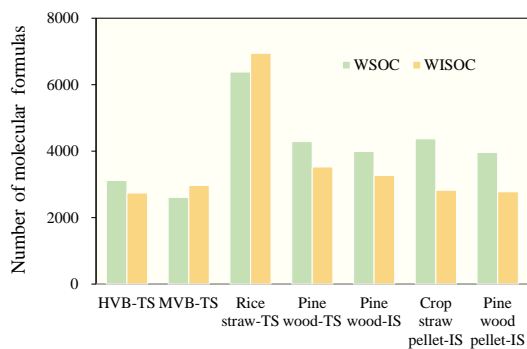

Fig.S3 Number of molecular formulas in each source sample, the different colors present WSOC and WISOC extract, respectively.

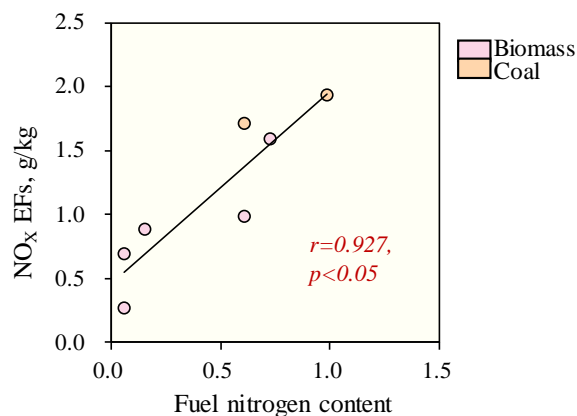

Fig. S4 Correlation between fuel nitrogen contents and emission factors of NO<sub>x</sub> (NO<sub>x</sub> EFs).

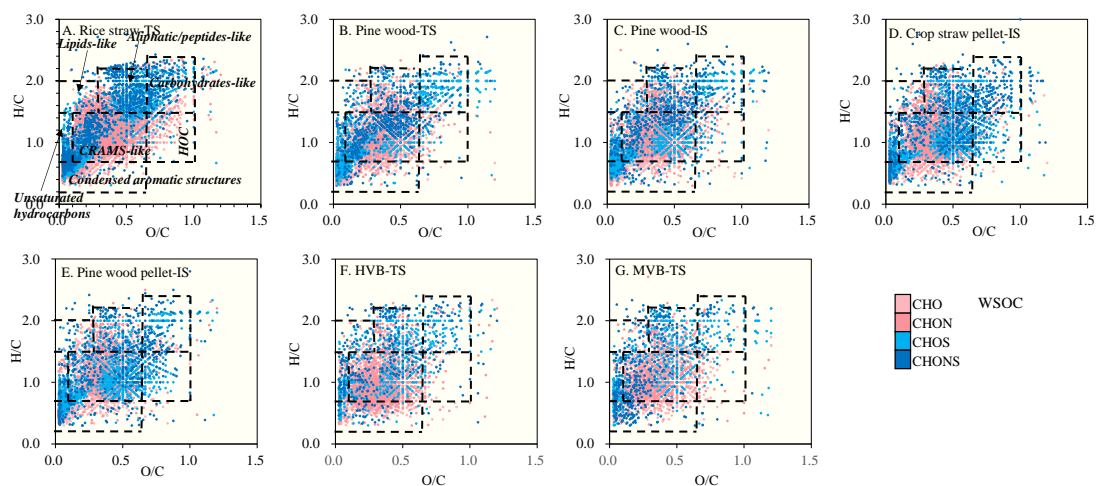

Fig. S5 Van Krevelen diagrams of WSOC of the seven aerosol samples. Different color indicates different identified group of CHO, CHON, CHOS, and CHONS

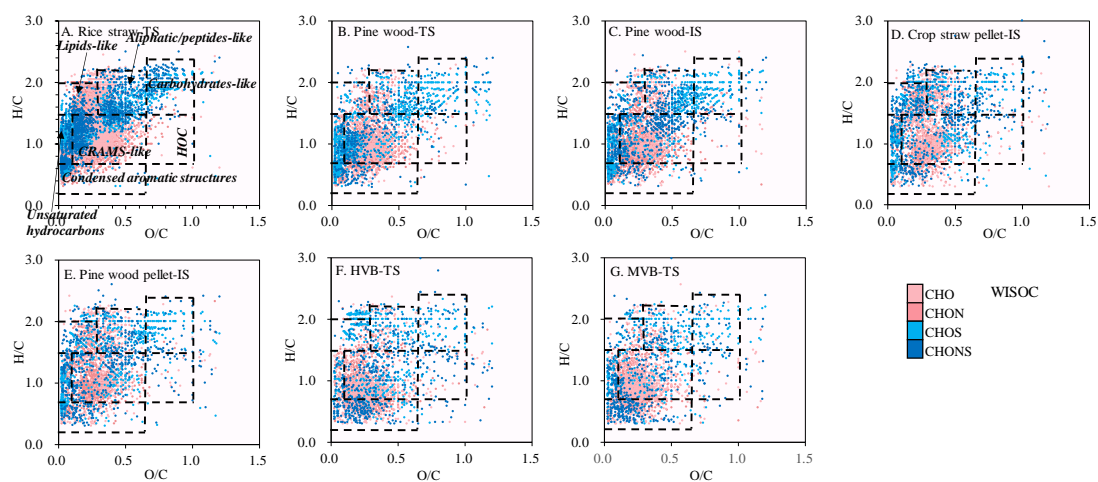

Fig. S6 Van Krevelen diagrams of WISOC of the seven aerosol samples. Different color indicates different identified group of CHO, CHON, CHOS, and CHONS



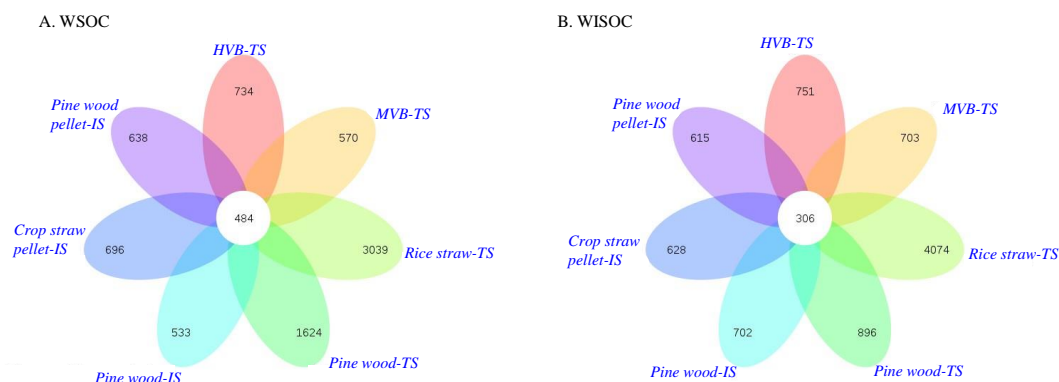

Fig. S7 Venn diagrams for the relative distributions of all molecular formulas in WSOC from the seven source samples. The areas of overlap are the common elements in all samples. The areas with no overlap are unique to that individual sample.

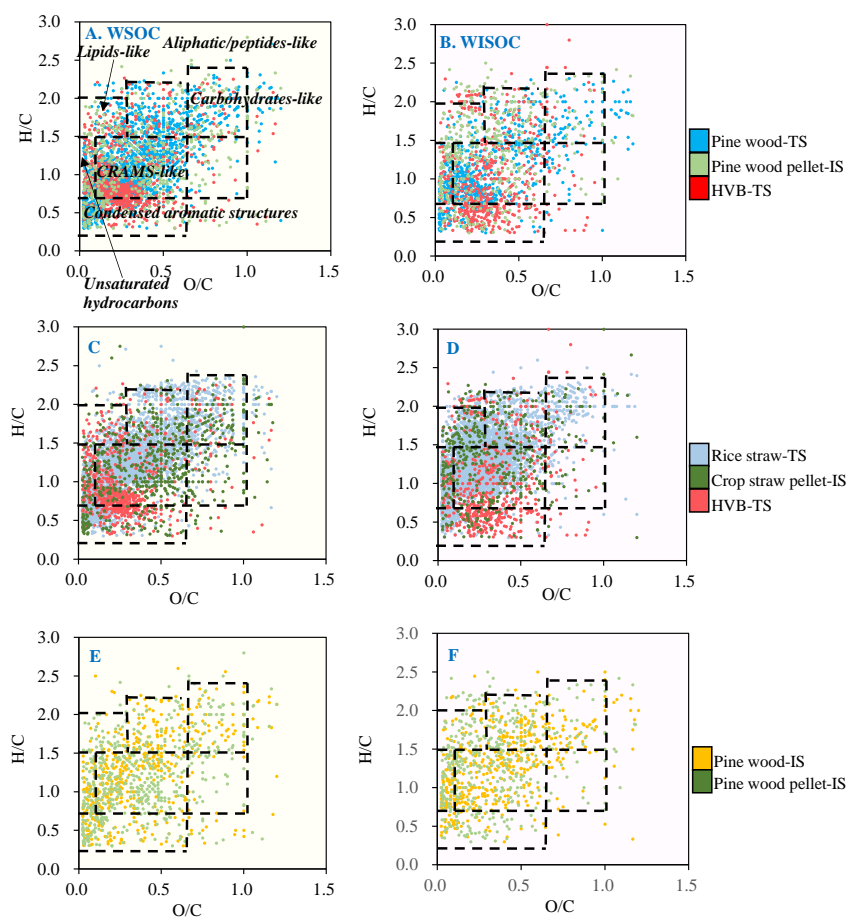

Fig. S8 Van Krevelen diagrams of WSOC (a) and WISOC (b) from the source samples. Different color indicates unique formulas detected in each sample of solid fuel combustion.

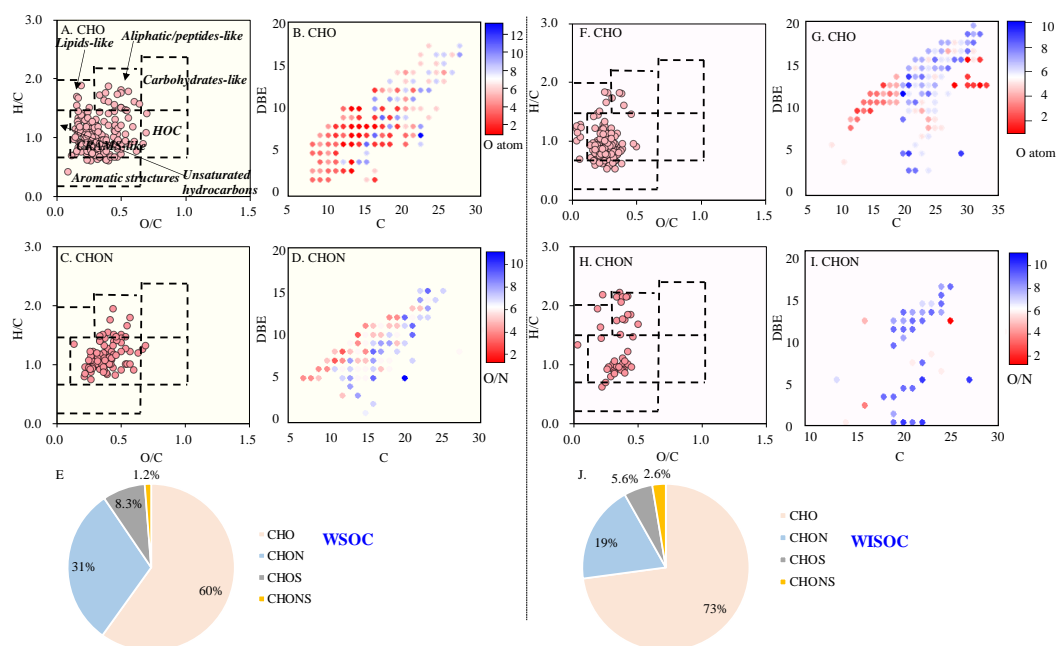

Fig. S9 Van Krevelen diagrams of common formulas in all samples of CHO group (A: WSOC, F: WISOC) and CHON group (C: WSOC, H:WISOC), and DBE vs C number for common formulas of CHO group (B: WSOC, G:WISOC) and CHON group (D: WSOC, I:WISOC), as well as the pie charts showing the relative intensities of different formula groups in the commonly detected formulas (E: WSOC, J: WISOC)

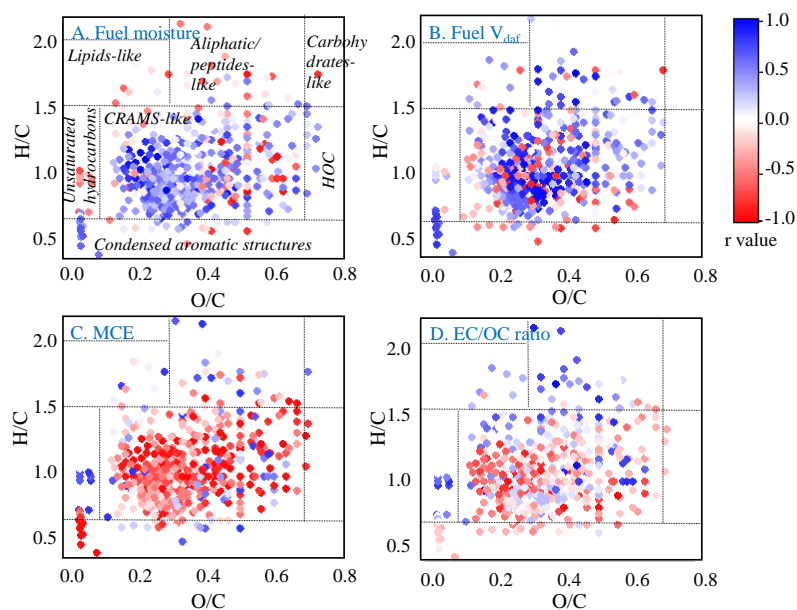

Fig. S10 Van Krevelen plots of WSOC and associations between individual molecules and (A) Fuel moisture, (B) Fuel V<sub>daf</sub>, (C) MCE, and (D) EC/OC ratios. Significant Spearman correlations ( $p < 0.05$ ) of individual molecules are presented. Color bar indicates direction and strength of the correlation (red, negative; cyan, negative). Circles indicate individual molecules. Black lines show class identification. The stoichiometric ranges set as boundaries of the classifications are reported in Table S3.

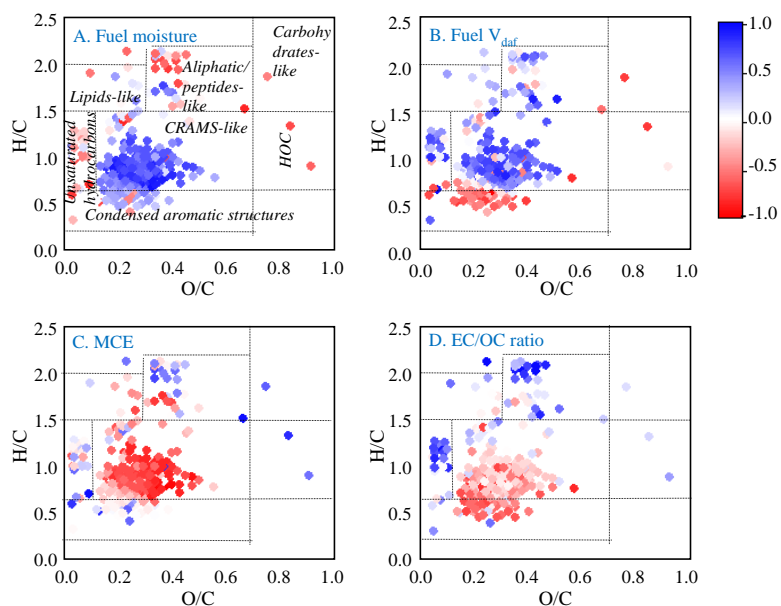

Fig. S11 Van Krevelen plots of WISOC and associations between individual molecules and (A) Fuel moisture, (B) Fuel V<sub>daf</sub>, (C) MCE, and (D) EC/OC ratios. Significant Spearman correlations ( $p < 0.05$ ) of individual molecules are presented. Color bar indicates direction and strength of the correlation (red, negative; cyan, positive). Circles indicate individual molecules. Black lines show class identification. The stoichiometric ranges set as boundaries of the classifications are reported in Table S3.

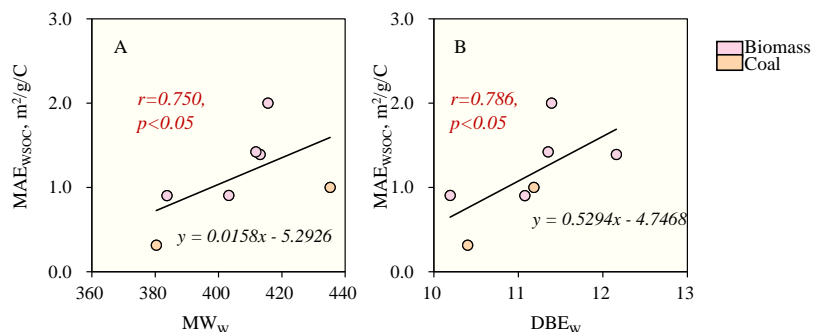

Fig. S12 Correlations of MAE<sub>365</sub> with the MW values (A) and DBE (B) of the potential BrC molecules from the source aerosol samples, respectively.

#### **S4. Reference**

Bianco, A., Deguillaume, L., Vaitilingom, M., Nicol, E., Baray, J.-L., Chaumerliac, N., and Bridoux, M.: Molecular Characterization of Cloud Water Samples Collected at the Puy de Dome (France) by Fourier Transform Ion Cyclotron Resonance Mass Spectrometry, *Environ. Sci. Technol.*, 52, 10275-10285, 10.1021/acs.est.8b01964, 2018.

Song, J. Z., Li, M. J., Zou, C. L., Cao, T., Fan, X. J., Jiang, B., Yu, Z. Q., Jia, W. L., and Peng, P. A.: Molecular Characterization of Nitrogen-Containing Compounds in Humic-like Substances Emitted from Biomass Burning and Coal Combustion, *Environ. Sci. Technol.*, 56, 119-130, 10.1021/acs.est.1c04451, 2022.
