# Supplementary material for: Comparison of water-soluble and insoluble organic compositions attributing to different light absorption efficiency between residential coal and biomass burning emissions
Source: Copernicus journal article supplement (doi:10.5194/egusphere-2023-2417), 2023-11-13
Supplement: Supplementary file [file egusphere-2023-2417-RC1-supplement.pdf]

More minor comments:

In your paper, the experimental part is methanol-soluble organic carbon (MSOC), but the other parts use WISOC. From the experimental process, this MSOC should be part of WISOC, right? How to express it more clearly?

Line 23-“SOCs” should be defined.

Line 120-“FT-ICR MS” should be defined.

Line 127-“ESI” should be defined.

Line 467-“EFs” should be defined.

Line 131 – “ESI-FT-ICR” should be “ESI-FT-ICR MS”?

Line 164,171-“WISOC”, “WSOC” (e.g. line 480, 486 , 489, 493, 498, 506 and others). Please pay attention to the font.
